# Supplementary material
Source: publisher figshare collection journal article supplement (https://sage.figshare.com/ndownloader/files/20105621)

## Supplemental Material

**FIGURE S1.** (a) Plain flip-flop sandal (used by the plain sandal group); (b) flip-flop sandal insole with metatarsal pad (used by participants of the sandal insole group with neutral foot); (c) flip-flop sandal insole with metatarsal bar (used by participants of the sandal insole group with cavus foot); (d) flip-flop sandal insole with medial arch support (used by participants of the sandal insole group with flat foot).

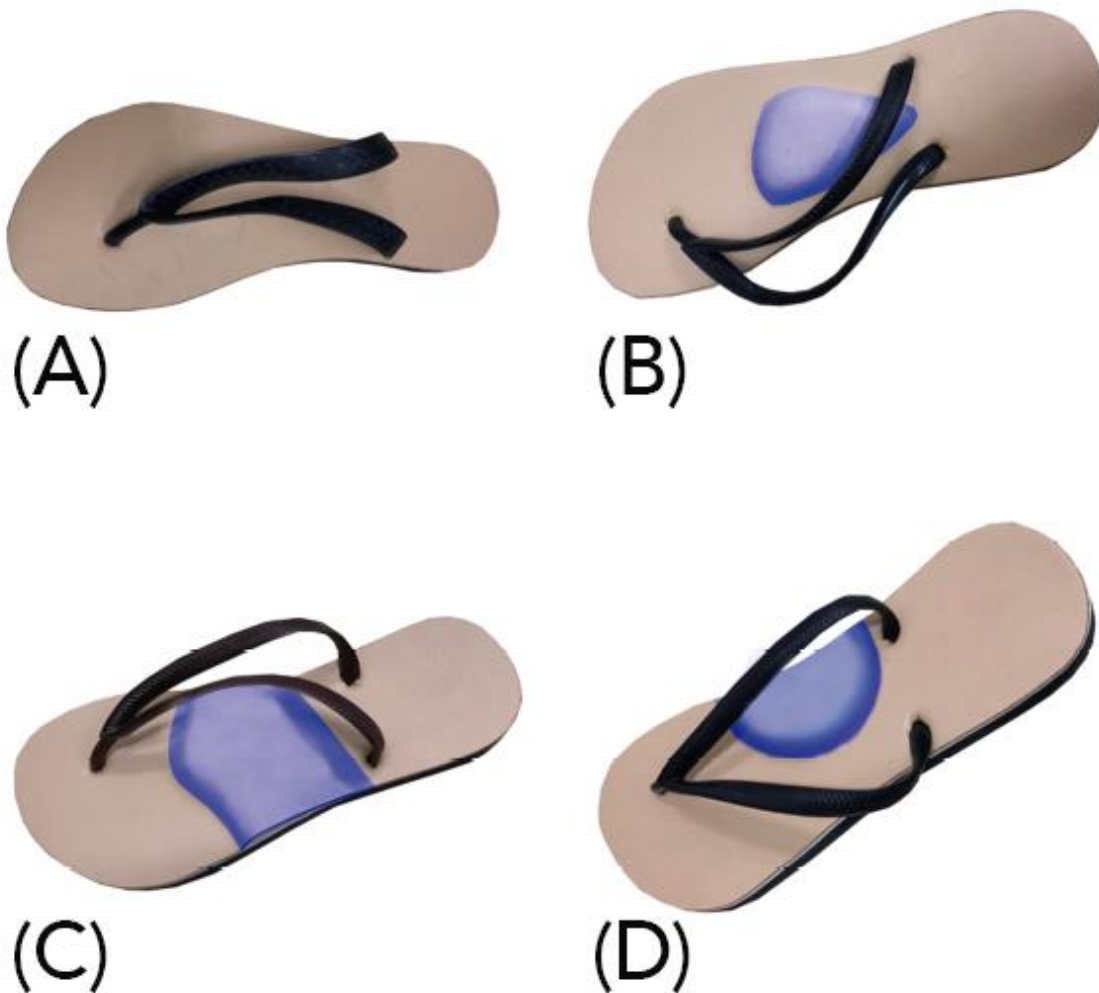

Supplement: Supplementary file 1 [file 20105621]
